# Supplementary material for: Personalized neoantigen vaccine combined with PD-1 blockade increases CD8+ tissue-resident memory T-cell infiltration in preclinical hepatocellular carcinoma models
Source: PubMed Central journal article supplement — J Immunother Cancer. 2022 Sep 15;10(9):e004389. doi: 10.1136/jitc-2021-004389 (PMC9486396; doi:10.1136/jitc-2021-004389), 2022-09-15
Supplement: jitc-2021-004389supp003.pdf [file jitc-2021-004389supp003.pdf]

**Table S2. Neoantigen mutations with high affinity to H-2K<sup>b</sup> allele**

| ID              | Gene     | Mutation | Expression level (TPM <sup>a</sup> ) | Peptide (MT <sup>b</sup> ) | IC50 (MT) |
|-----------------|----------|----------|--------------------------------------|----------------------------|-----------|
| chr7_126764306  | Mapk3    | S284F    | 205.33                               | MKARNYLQFLPSKTKVA          | 283.5     |
| chr5_144816376  | Trrap    | A1818G   | 170.78                               | LRIYLLQYGTLLVEHAP          | 145.5     |
| chr1_181821532  | Lbr      | A341P    | 102.66                               | LYTHFLQLPLAATGFSV          | 454.6     |
| chr17_24511368  | Traf7    | C403W    | 101.55                               | WDTCTTYKWQKTLEGHD          | 58.2      |
| chr15_97799627  | Hdac7    | N670T    | 73.6                                 | TAMGFCCFFTSVAIACRQ         | 8.3       |
| chr1_74523538   | Cnot9    | I155M    | 72.99                                | VKTDEQEVNMNLLTTEI          | 147.4     |
| chr5_115088314  | Sppl3    | A176G    | 55.38                                | ALAMGLCVGMIAFVRLP          | 17.8      |
| chr6_3375005    | Samd9l   | K752M    | 45.05                                | HVLWDLKQMFRCVAVLKN         | 388.7     |
| chr2_112241960  | Lpcat4   | R98H     | 44.67                                | HNGVLGLSHLLFFLLGF          | 172       |
| chr19_41952479  | Mms19    | E615K    | 43.77                                | AEKCQQDPKSYWYFHKT          | 20.2      |
| chr11_119442085 | Rnf213   | A2708P   | 41                                   | RTNIARNLPLKENVFMM          | 179.7     |
| chr18_67672646  | Ptpn2    | I383T    | 32.31                                | KRWLYWQPTLTKMGFVS          | 367       |
| chr10_77268562  | Pofut2   | F391Y    | 31.67                                | GTSVSTFSYRIHEEREI          | 314.7     |
| chr1_85659818   | Sp100    | E48K     | 28.63                                | IRSTFPFLKSLRDHEFI          | 8.5       |
| chr9_99070268   | Pik3cb   | Q495H    | 26.8                                 | ITFPENKKHPCYPPFD           | 170.7     |
| chr2_121534245  | Wdr76    | F343L    | 25.2                                 | PGTSYEKFLNSSLEKIR          | 133.7     |
| chr17_25662545  | Lmf1     | F523V    | 23.84                                | RGEHYRYKVSPLGGQHA          | 414.9     |
| chr17_47603862  | Bysl     | A232G    | 23.11                                | WTAAAMYQGTRIFASNL          | 317.8     |
| chr9_103191097  | Srprb    | L190V    | 21.15                                | IAMAKSAKVIQQQLEKE          | 390.9     |
| chr5_34889473   | Htt      | A2378P   | 17.9                                 | LKNIVISLPRPLVNSY           | 157.1     |
| chr5_137921494  | Cyp3a13  | F7V      | 17.88                                | MDLIPNFSVETWMLLAT          | 46.6      |
| chr9_59871962   | Myo9a    | S1667F   | 16.21                                | STHFYSHRFDPSREGS           | 183.7     |
| chr8_22380907   | Slc25a15 | F185V    | 8.17                                 | LLREVPGYVFFGGYEL           | 378.3     |
| chr12_3591957   | Dtnb     | K40T     | 7.87                                 | LSTYRTACTLRFVQKRC          | 77.4      |
| chr8_70134231   | Rfxank   | R235H    | 5.36                                 | DLAVALGYHKVQQVMES          | 493.9     |
| chr10_22287191  | H60b     | I222L    | 1.83                                 | IVIICIGGLVSFMAFMV          | 364.2     |

a: TPM, transcripts per million;

b: MT, mutation.
