# Supplementary figures and images for: Personalized neoantigen vaccine combined with PD-1 blockade increases CD8+ tissue-resident memory T-cell infiltration in preclinical hepatocellular carcinoma models
Source: PubMed Central journal article supplement — J Immunother Cancer. 2022 Sep 15;10(9):e004389. doi: 10.1136/jitc-2021-004389 (PMC9486396; doi:10.1136/jitc-2021-004389), 2022-09-15

**Figure S1**

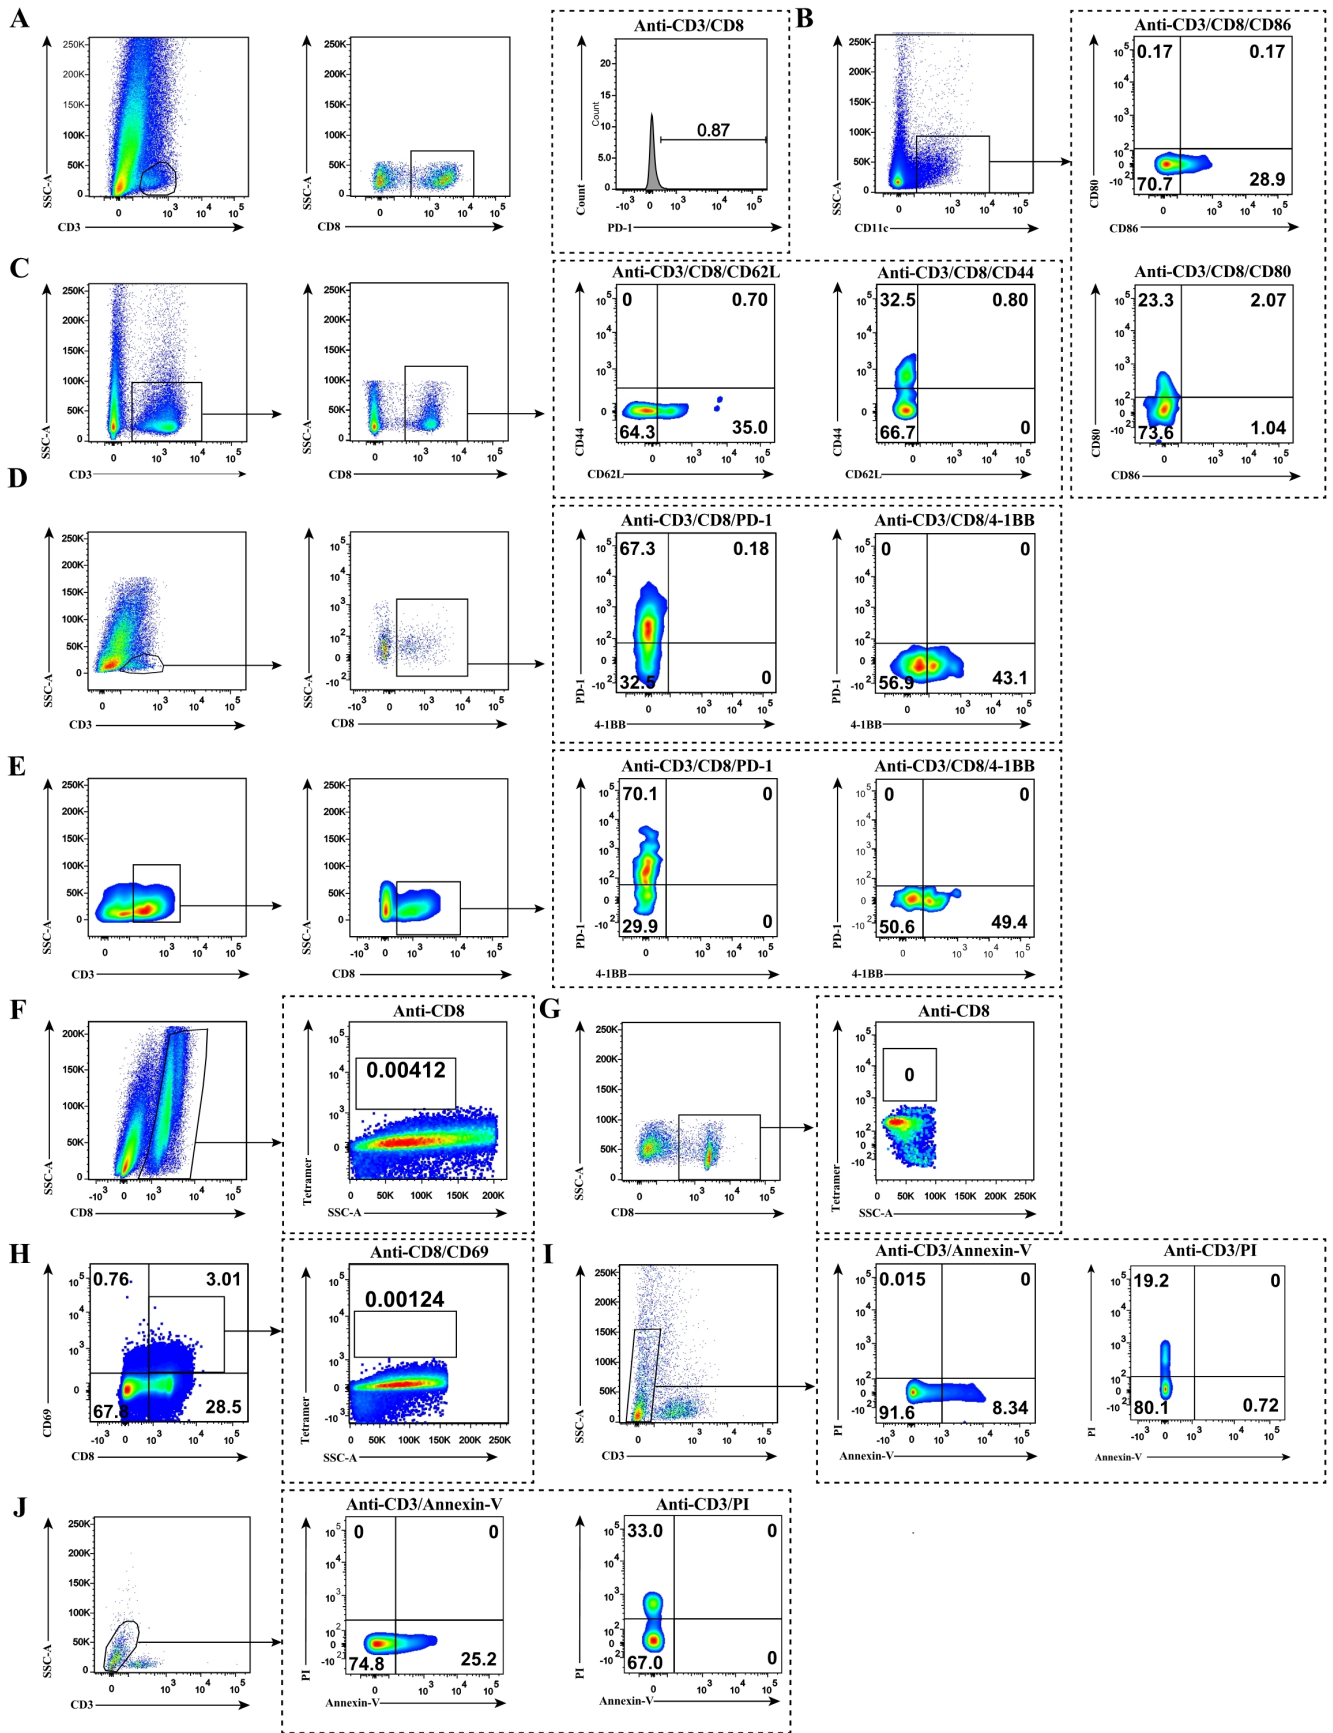

Supplement: jitc-2021-004389supp004.pdf [file jitc-2021-004389supp004.pdf]

**Figure S2**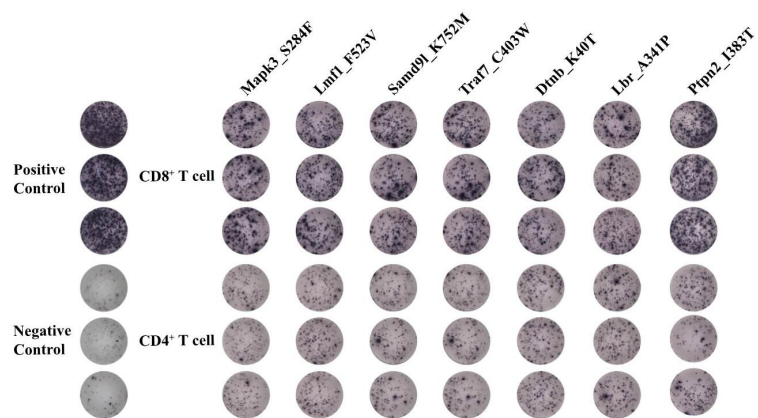

Supplement: jitc-2021-004389supp005.pdf [file jitc-2021-004389supp005.pdf]

Figure S3

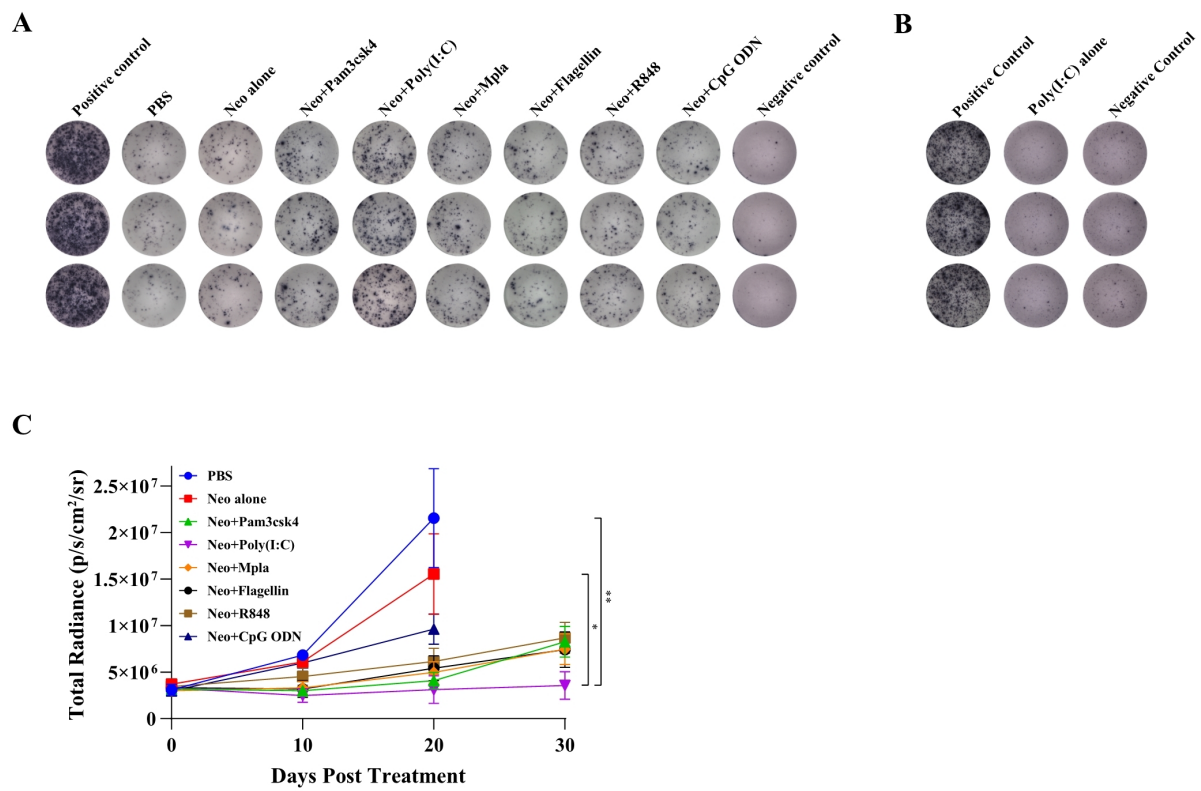

Supplement: jitc-2021-004389supp006.pdf [file jitc-2021-004389supp006.pdf]

Figure S4

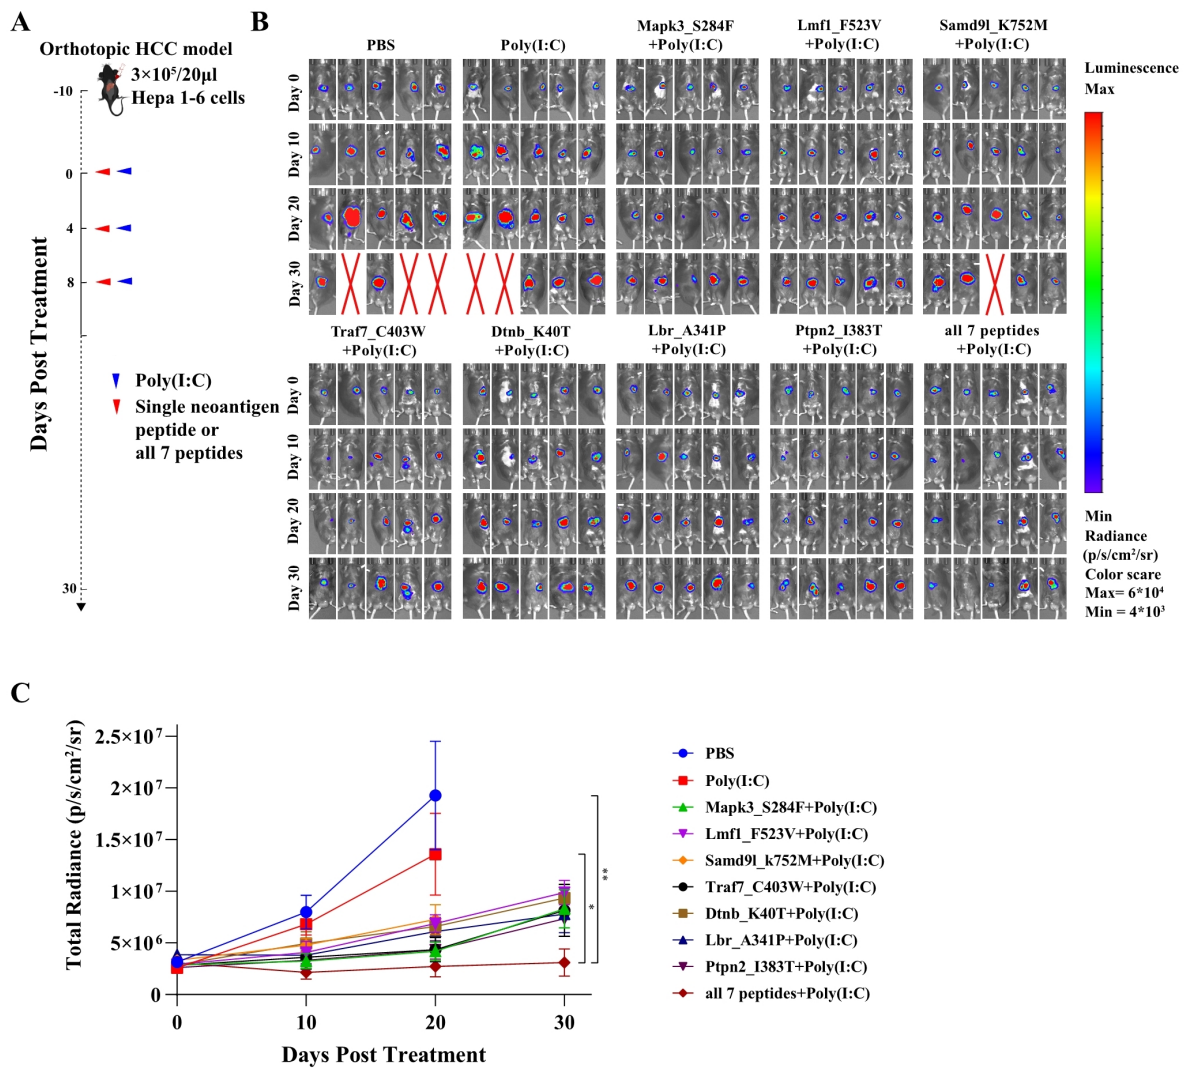

Supplement: jitc-2021-004389supp007.pdf [file jitc-2021-004389supp007.pdf]

**Figure S5**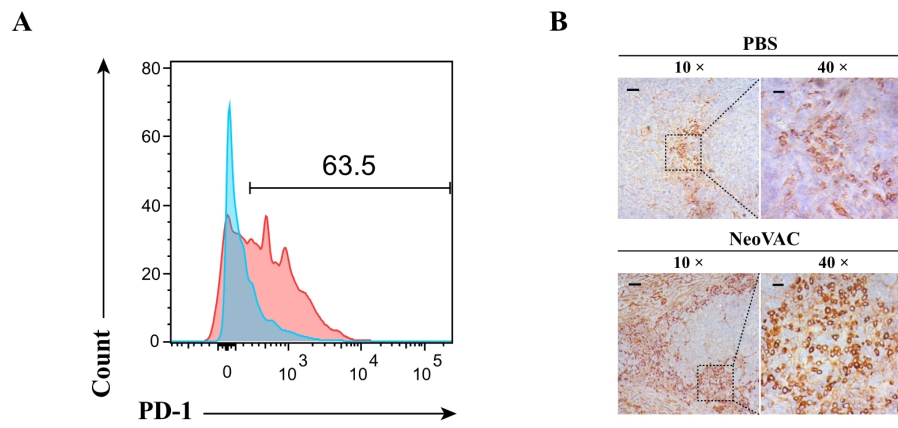

Supplement: jitc-2021-004389supp008.pdf [file jitc-2021-004389supp008.pdf]

Figure S6

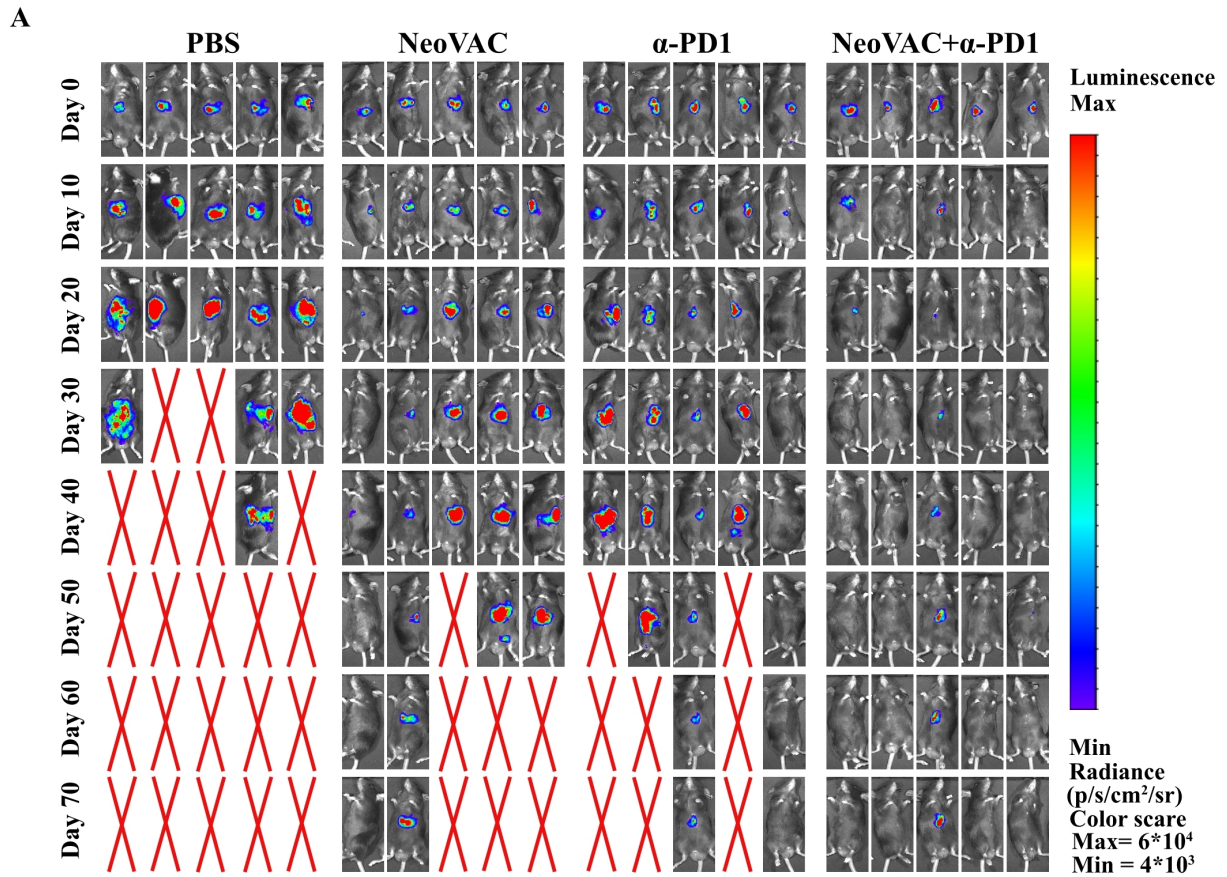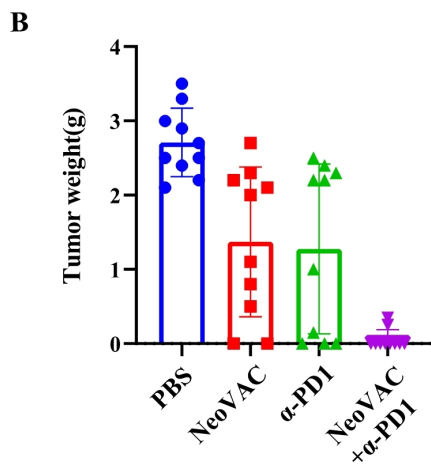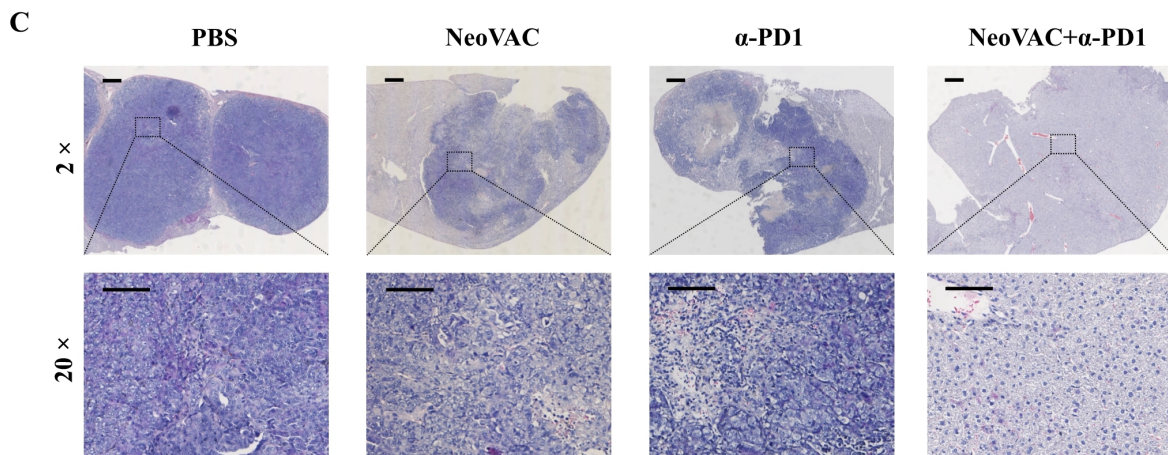

Supplement: jitc-2021-004389supp009.pdf [file jitc-2021-004389supp009.pdf]

Figure S7

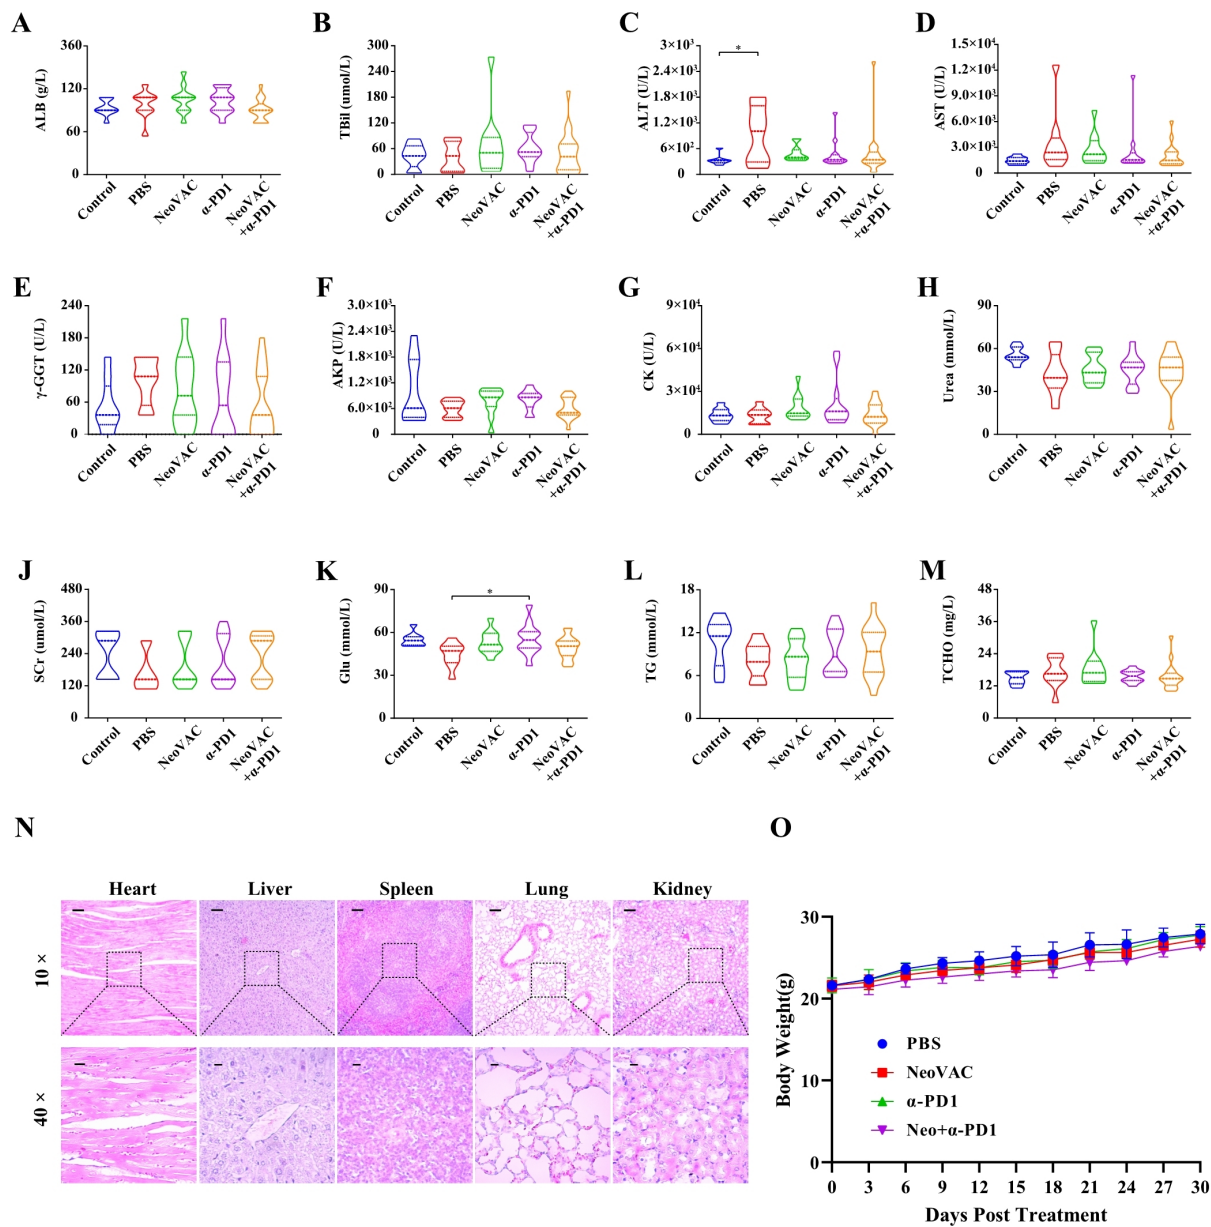

Supplement: jitc-2021-004389supp010.pdf [file jitc-2021-004389supp010.pdf]

Figure S8

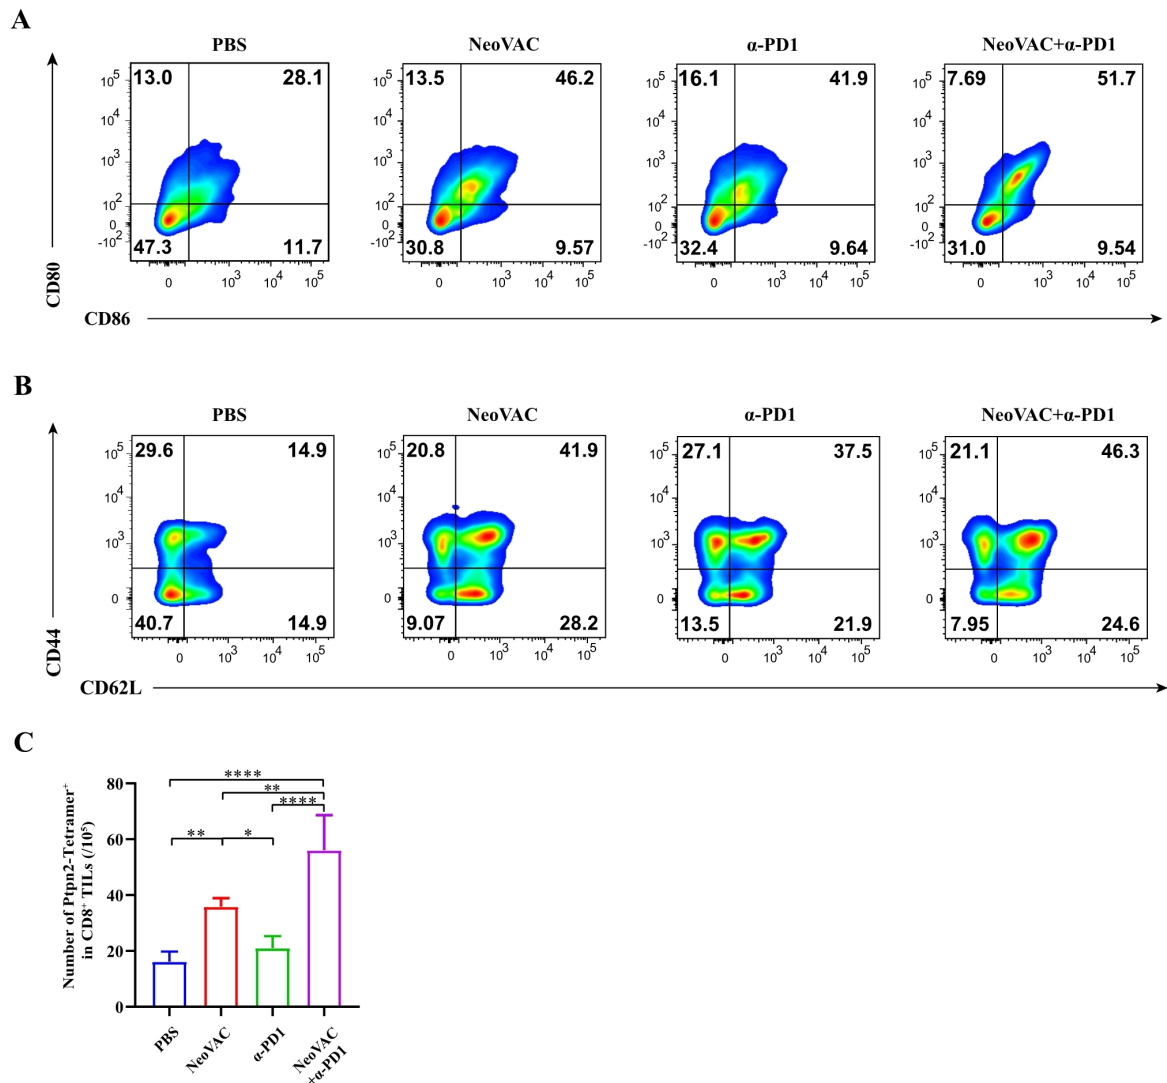

Supplement: jitc-2021-004389supp011.pdf [file jitc-2021-004389supp011.pdf]

Figure S9

A

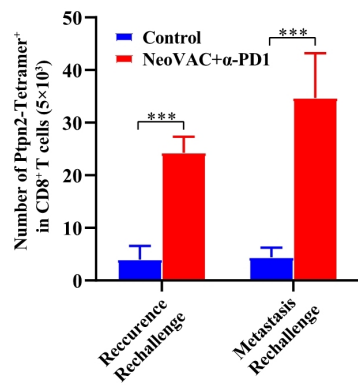

B

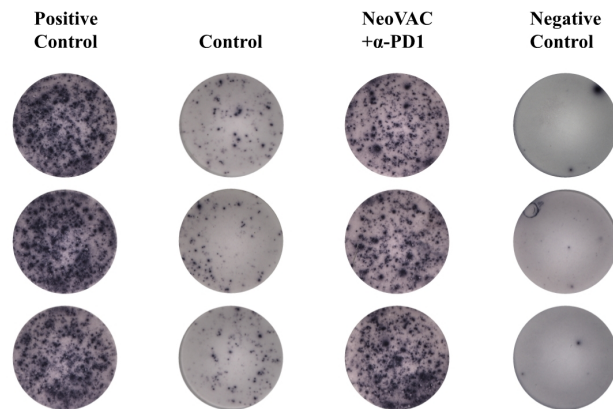

Supplement: jitc-2021-004389supp012.pdf [file jitc-2021-004389supp012.pdf]

Figure S10

A

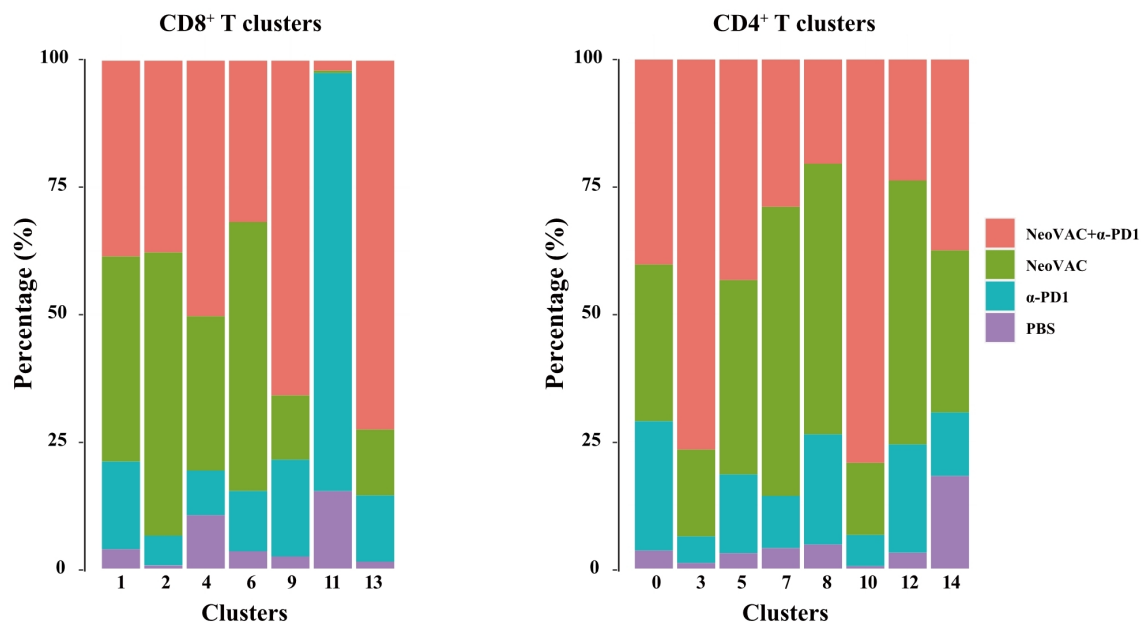

B

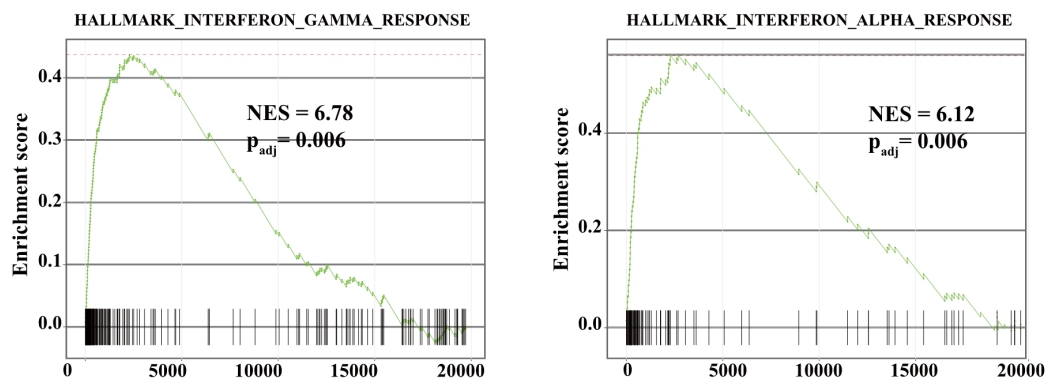

C

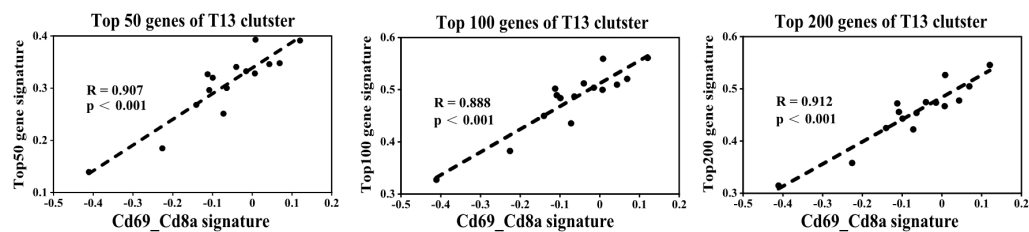

Supplement: jitc-2021-004389supp013.pdf [file jitc-2021-004389supp013.pdf]

Figure S11

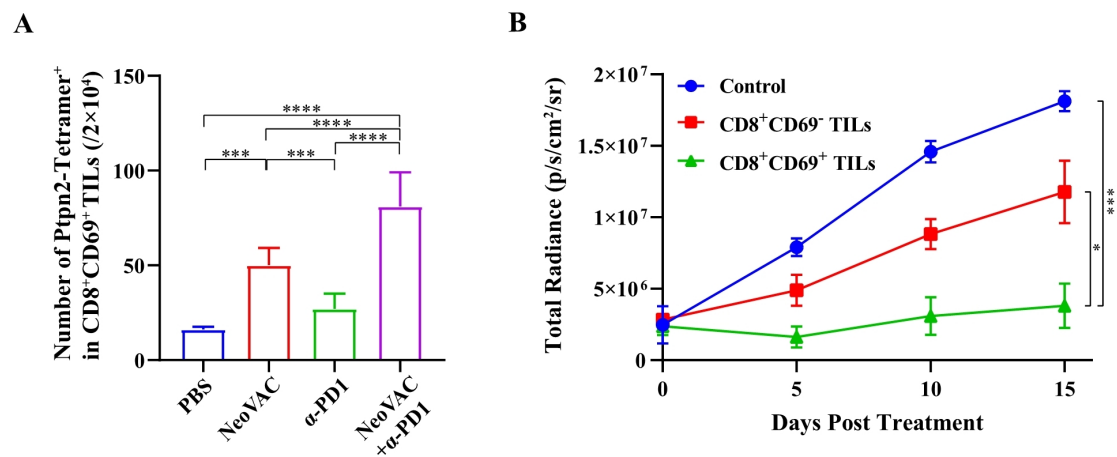

Supplement: jitc-2021-004389supp014.pdf [file jitc-2021-004389supp014.pdf]
